# Supplementary material for: ‘Phoenix polymers’: fire induced nanohardness in fibril-forming aromatic cyanate esters
Source: Royal Society of Chemistry journal article supplement (doi:10.1039/c8ra07449f), 2018-01-01
Supplement: c8ra07449f1.pdf [file c8ra07449f1.pdf]

**‘Phoenix Polymers’: fire induced nanohardness in fibril-forming aromatic cyanate esters**

**Lyndsey Mooring, Scott Thompson, Stephen A Hall, Silvia Pani, Peter Zioupos, Martin Swan, Corinne Stone, Brendan J. Howlin, and Ian Hamerton\***

**Supplementary Data**

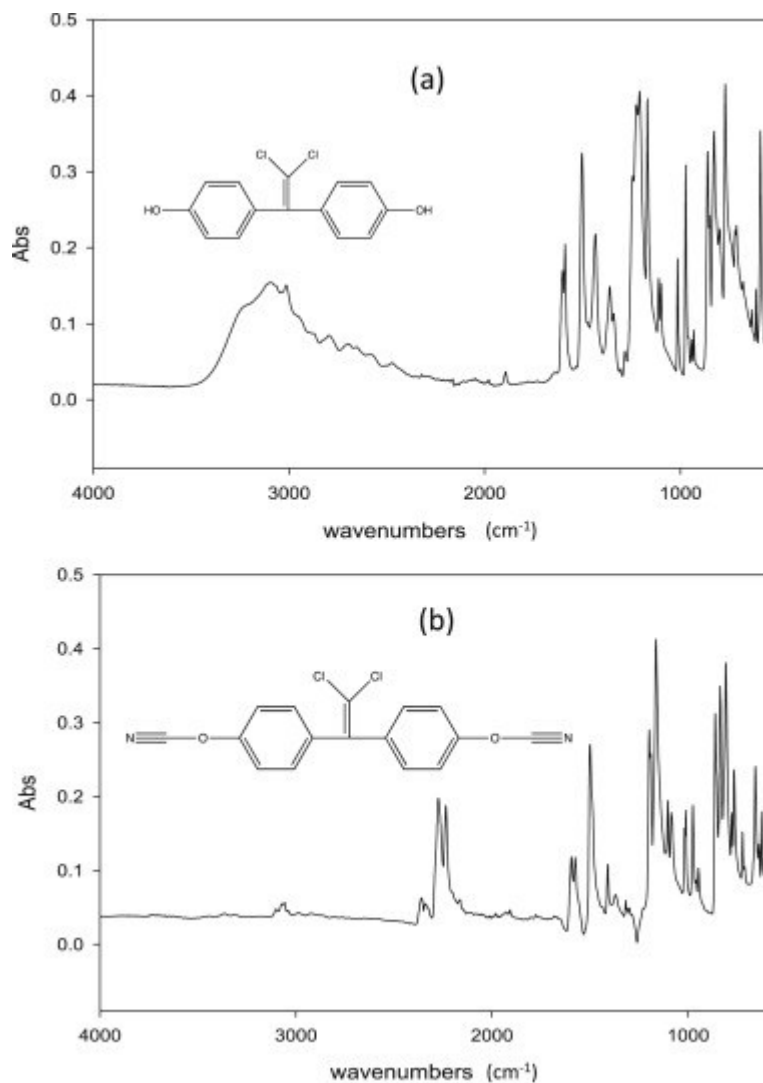

Figure S1. ATR spectra of (a) 1,1-dichloro-2,2-(4-hydroxyphenyl)ethyldene and (b) 1,1-dichloro-2,2-(4-cyanatophenyl)ethyldene (**2**).

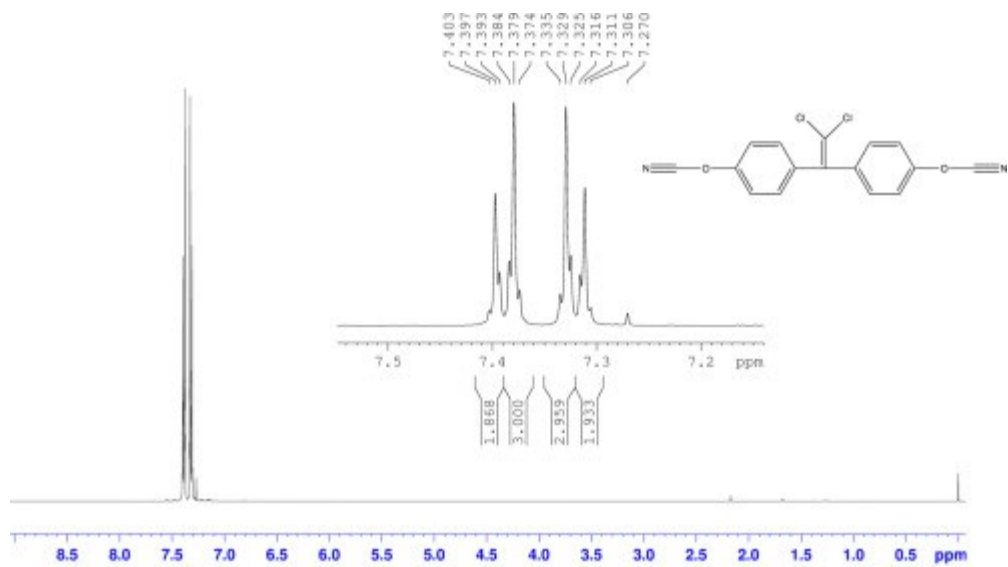

Figure S2. <sup>13</sup>C NMR spectrum of 1,1-dichloro-2,2-(4-cyanatophenyl)ethyldene (2).

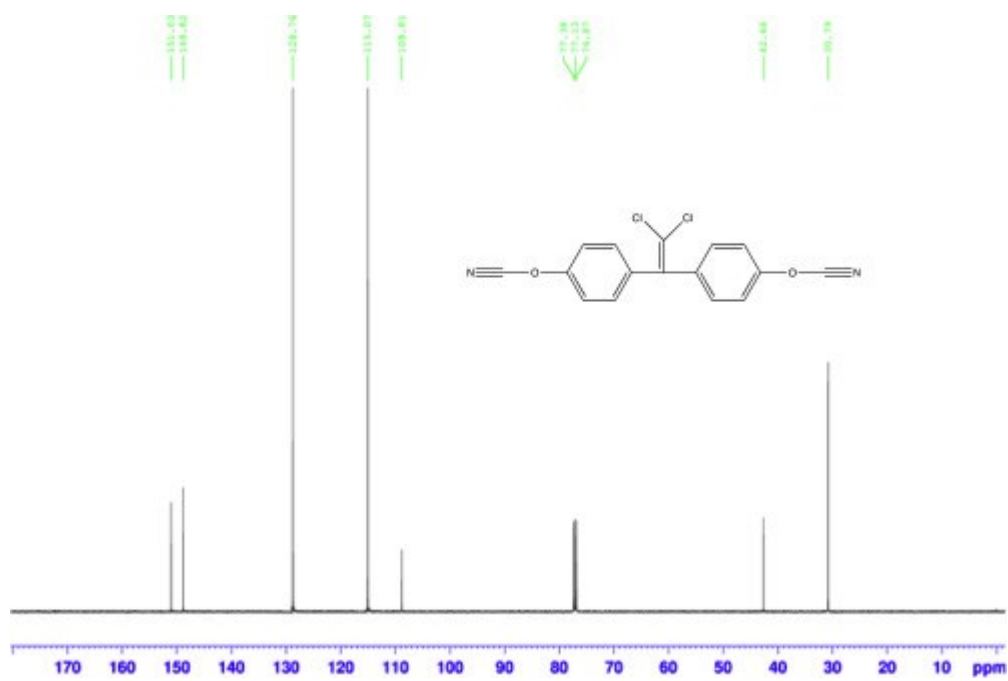

Figure S3. <sup>1</sup>H NMR spectrum of 1,1-dichloro-2,2-(4-cyanatophenyl)ethyldene (2).
